# Supplementary material for: Modelling 5-km Running Performance on Level and Hilly Terrains in Recreational Runners
Source: MDPI journal article supplement (doi:10.3390/biology11050789), 2022-05-22
Supplement: s1 [file s1]

## Supplemental material S1 - Secondary findings.

### Modelling 5-km running performance on level and hilly terrains in recreational runners

#### SM1.1 - Correlations between 5-km running performance on level and hilly terrains versus anthropometric and neuromuscular variables in recreational runners

Table S1.1 Pearson correlation coefficients (*r*) and p-values (*P*) between level and hilly running performance *versus* anthropometric and neuromuscular variables.

| Variables                                 | Level    |          | Hilly    |          |
|-------------------------------------------|----------|----------|----------|----------|
|                                           | <i>r</i> | <i>P</i> | <i>r</i> | <i>P</i> |
| Body Mass (kg)                            | -.032    | .892     | -.089    | .708     |
| Height (m)                                | -.088    | .711     | -.054    | .820     |
| Body Fat (%)                              | -.086    | .718     | -.028    | .907     |
| BMI (kg.m <sup>-2</sup> )                 | -.029    | .972     | -.078    | .745     |
| LLL (cm)                                  | -.008    | .902     | -.003    | .989     |
| Maximum ST (kg)                           | -.334    | .150     | -.180    | .448     |
| Relative ST (kg·body mass <sup>-1</sup> ) | -.424    | .062     | -.194    | .413     |

Body Mass Index (BMI), Lower Limb Length (LLL), Strength (ST).

**SM1.2 - Correlations between 5-km running performance on level and hilly terrains versus physiological variables in recreational runners. In this section, we have included the non-specific correlations, i.e., between level performance versus physiological variables determined from uphill (7%) tests, and between hilly performance versus physiological**

**variables determined from level (0%) tests.**

Table S1.2 Pearson correlation coefficients ( $r$ ) and p-values ( $P$ ) between level running performance *versus* physiological variables evaluated in maximal and submaximal tests at 7% incline.

| Variables             | level running performance |      |
|-----------------------|---------------------------|------|
|                       | $r$                       | $P$  |
| VO <sub>2</sub> max   | -.404                     | .070 |
| vVO <sub>2</sub> max  | -.530                     | .016 |
| VT <sub>1</sub>       | -.078                     | .744 |
| vVT <sub>1</sub>      | -.285                     | .223 |
| HR at VT <sub>1</sub> | .032                      | .894 |
| VT <sub>2</sub>       | -.417                     | .067 |
| vVT <sub>2</sub>      | -.758                     | .001 |
| HR at VT <sub>2</sub> | .247                      | .294 |
| RE                    | -.298                     | .202 |
| HR <sub>RE</sub>      | .807                      | .001 |

Table S1.3 Pearson correlation coefficients ( $r$ ) and p-values ( $P$ ) between hilly running performance *versus* physiological variables evaluated in maximal and submaximal tests at 0% incline.

| Variables | hilly running performance |     |
|-----------|---------------------------|-----|
|           | $r$                       | $P$ |

|                       |       |      |
|-----------------------|-------|------|
| VO <sub>2</sub> max   | -.332 | .153 |
| vVO <sub>2</sub> max  | -.633 | .003 |
| VT <sub>1</sub>       | -.400 | .080 |
| vVT <sub>1</sub>      | -.416 | .068 |
| HR at VT <sub>1</sub> | .027  | .911 |
| VT <sub>2</sub>       | -.464 | .039 |
| vVT <sub>2</sub>      | -.636 | .003 |
| HR at VT <sub>2</sub> | .316  | .175 |
| RE                    | -.274 | .243 |
| HR <sub>RE</sub>      | .653  | .002 |
